# Supplementary material for: Genetic Diversity of Trypanosomes Infesting Cattle from Savannah District in North of Côte d’Ivoire Using Conserved Genomic Signatures: rRNA, ITS1 and gGAPDH
Source: MDPI journal article supplement (doi:10.3390/pathogens13030262), 2024-03-19
Supplement: s1 [file s1]

**Table S1.** Trypanosomes band sizes expected and primers sequences.

| PCR<br>sequence target                                                                              | DNA                                                  | Primer sequence (5'-3')                                                                                                                                                                                  | Trypanosomes<br>species and band<br>sizes                                                                                                                                        | References |
|-----------------------------------------------------------------------------------------------------|------------------------------------------------------|----------------------------------------------------------------------------------------------------------------------------------------------------------------------------------------------------------|----------------------------------------------------------------------------------------------------------------------------------------------------------------------------------|------------|
| ITS1 PCR, target<br>non-coding DNA<br>between 18S and<br>5.8S rRNA genes                            | ITS1 CF:<br>ITS1 BR:                                 | 5'-CCGGAAGTTCACCGATATTG-3'<br>5'-TTGCTGCGTTCTTCAACGAA-3'                                                                                                                                                 | <i>T.vi</i> (250bp); <i>T.br</i><br>(480bp); <i>T.cs</i><br>(700bp); <i>T.cf</i><br>(710bp); <i>T.s</i> (400bp);<br><i>T.s.t</i> (370bp); <i>T.th</i><br>(273bp)                 | [11]       |
| Nested ITS PCR<br>target partial 18S,<br>ITS1, 5.8S, ITS2 and<br>partial 28S rRNA<br>genes          | ITS1:<br>ITS2:<br>ITS3:<br>ITS4:                     | 5'-GATTACGTCCCTGCCATTTG-3'<br>5'-TTGTTTCGCTATCGGTCTTCC-3'<br>5'-GGAAGCAAAAGTCGTAACAAGG-3'<br>5'-TGTTTTCTTTTCCTCCGCTG-3'                                                                                  | <i>T.vi</i> (620bp); <i>T.br</i><br>(1215bp); <i>T.cs</i><br>(1408-1501bp); <i>T.cf</i><br>(1408-1501bp); <i>T.s</i><br>(847bp); <i>T.s.t</i><br>(951bp); <i>T.th</i><br>(998bp) | [19]       |
| Nested PCR target<br>Glycosomal<br>glyceraldehyde-3-<br>phosphate<br>dehydrogenase<br>gene (gGAPDH) | G3:<br>G5:<br>G1:<br>GAGAT-3'<br>G4a:<br>G4b:<br>Gs: | 5'-TTYGCCGYATYGGYCGCATGG-3'<br>5'-ACMAGRTCCACCACRCGGTG-3'<br>5'-CGCGGATCCASGGYCTYMTCCGGBAMK<br>GAGAT-3'<br>5'-GTTYTGCAAGSGTCGCCTTGG-3'<br>5'-CCAMGASACVAYCTTGAAGAA-3'<br>5'-GCSTAY CAG ATG AAG TACGAC-3' | <i>T.vi</i> (620bp); <i>T.br</i><br>(1215bp); <i>T.cs</i><br>(1408-1501bp); <i>T.cf</i><br>(1408-1501bp); <i>T.s</i><br>(847bp); <i>T.s.t</i><br>(951bp); <i>T.th</i><br>(998bp) | [20]       |

PCR: Polymerase chain reaction; ITS: Internal Transcribed Space; DNA: Desoxyribo Nucleic Acid.

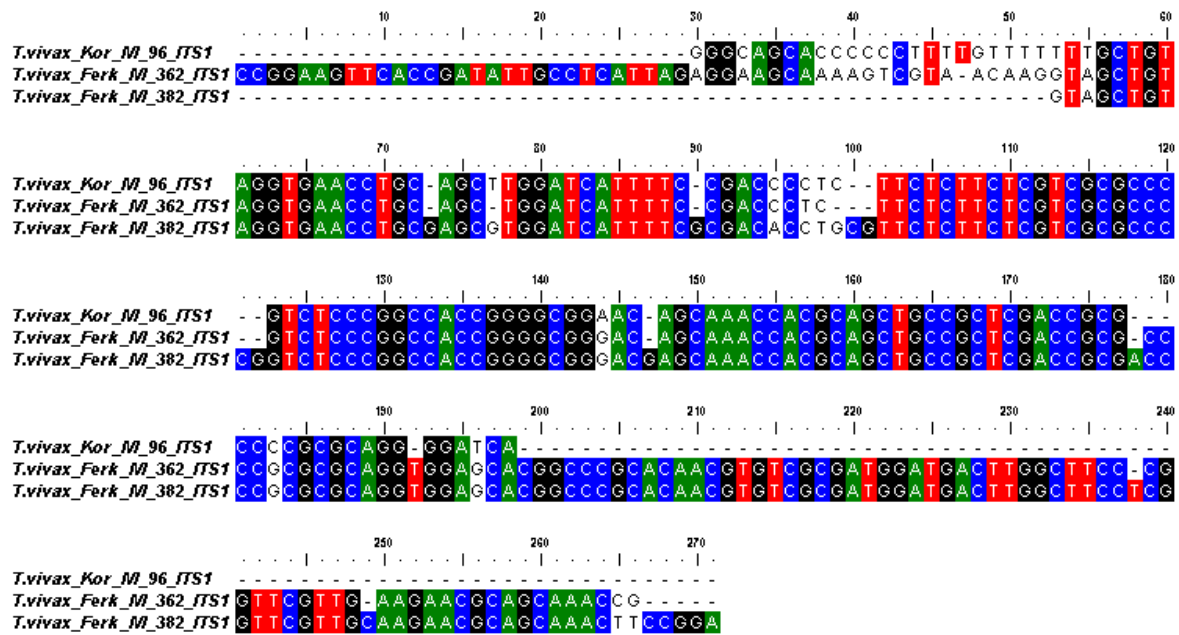

**Figure S1.** Cluster W alignment of *T. vivax* strain based on Internal Transcribed Spacer 1 (ITS1).

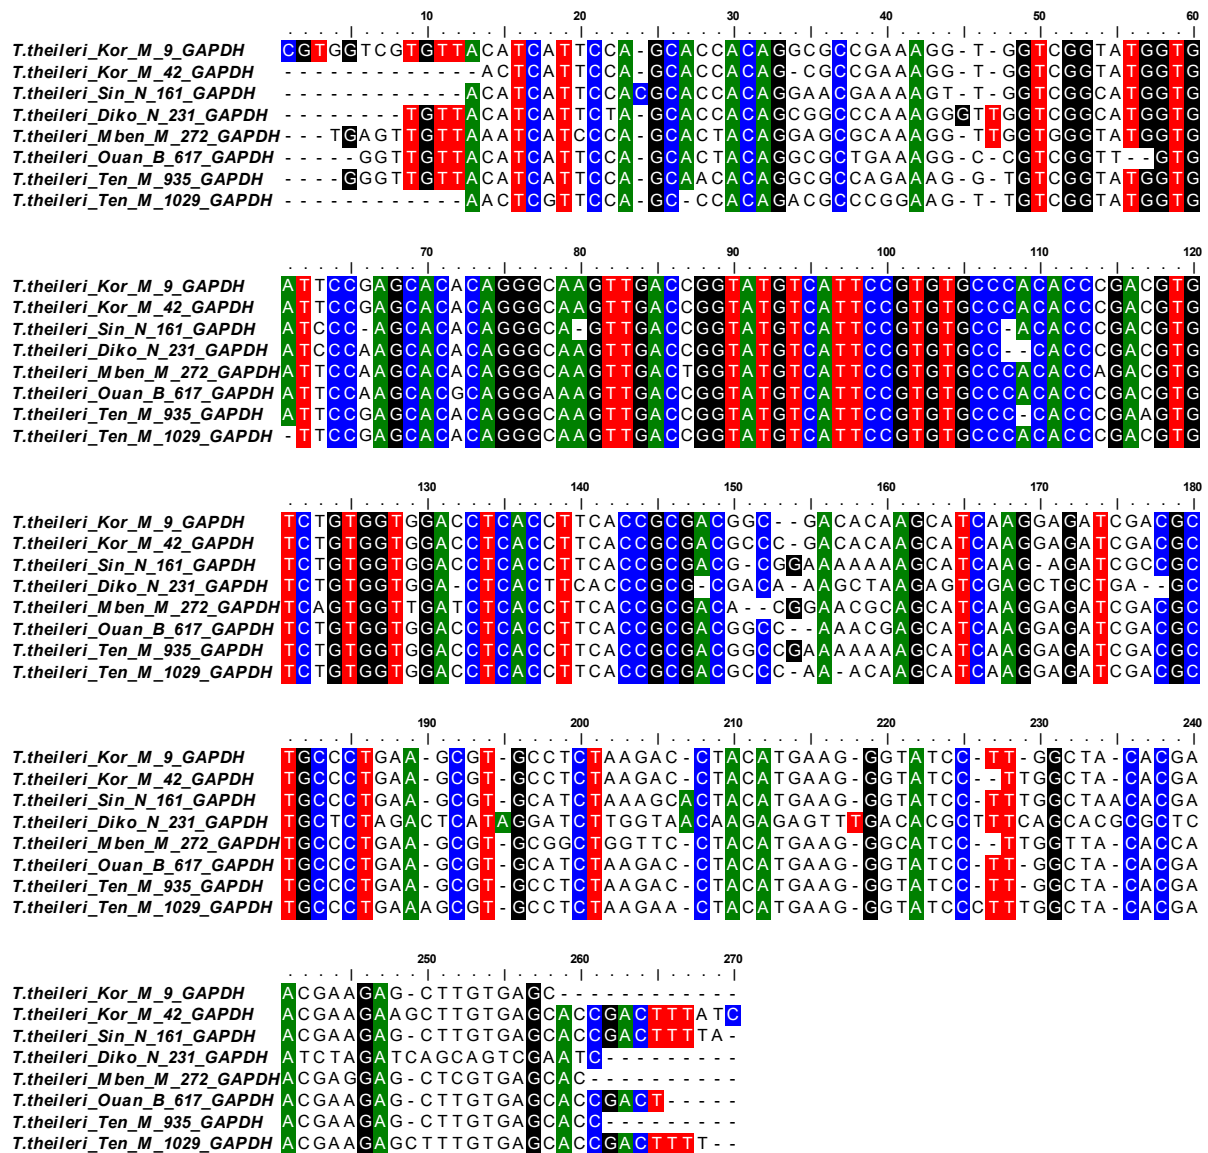

**Figure S2.** Cluster W alignment of *T. theileri* strain according to the Glycosomal glyceraldehyde-3-phosphate dehydrogenase gene (gGAPDH).
